# Supplementary material for: Whole-Exome Sequencing in Age-Related Macular Degeneration Identifies Rare Variants in COL8A1, a Component of Bruch’s Membrane
Source: PubMed Central journal article supplement — Ophthalmology. 2018 Sep;125(9):1433–43. doi: 10.1016/j.ophtha.2018.03.040 (PMC6104593; doi:10.1016/j.ophtha.2018.03.040), 2018-09
Supplement: mmc1.pdf [file mmc1.pdf]

| Gene ID  | Chr | Start bp  | End bp    | Strand |
|----------|-----|-----------|-----------|--------|
| KCNT2    | 1   | 196194909 | 196578355 | -1     |
| CFH      | 1   | 196621008 | 196716634 | 1      |
| CFHR3    | 1   | 196743925 | 196763203 | 1      |
| CFHR1    | 1   | 196788887 | 196801319 | 1      |
| CFHR2    | 1   | 196788898 | 196928356 | 1      |
| CFHR4    | 1   | 196819371 | 196888102 | 1      |
| CFHR5    | 1   | 196946667 | 196978804 | 1      |
| F13B     | 1   | 197008321 | 197036397 | -1     |
| ASPM     | 1   | 197053258 | 197115824 | -1     |
| ZBTB41   | 1   | 197122810 | 197169672 | -1     |
| CRB1     | 1   | 197170592 | 197447585 | 1      |
| DENND1B  | 1   | 197473878 | 197744826 | -1     |
| IRS1     | 2   | 227596033 | 227664475 | -1     |
| RHBDD1   | 2   | 227700297 | 227863931 | 1      |
| COL4A4   | 2   | 227867427 | 228028829 | -1     |
| COL4A3   | 2   | 228029281 | 228179508 | 1      |
| MFF      | 2   | 228189867 | 228222550 | 1      |
| TM4SF20  | 2   | 228226872 | 228246711 | -1     |
| AGFG1    | 2   | 228336868 | 228425930 | 1      |
| C2orf83  | 2   | 228474806 | 228498036 | -1     |
| SLC19A3  | 2   | 228549926 | 228582728 | -1     |
| PRICKLE2 | 3   | 64079543  | 64431152  | -1     |
| ADAMTS9  | 3   | 64501333  | 64673676  | -1     |
| DCBLD2   | 3   | 98514785  | 98620533  | -1     |
| COL8A1   | 3   | 99357319  | 99518070  | 1      |
| FILIP1L  | 3   | 99548985  | 99833357  | -1     |
| TBC1D23  | 3   | 99979844  | 100044095 | 1      |
| NIT2     | 3   | 100053545 | 100075710 | 1      |
| TOMM70A  | 3   | 100082275 | 100120242 | -1     |
| LNP1     | 3   | 100120037 | 100175163 | 1      |
| TMEM45A  | 3   | 100211463 | 100296288 | 1      |
| COL25A1  | 4   | 109731877 | 110223813 | -1     |
| SEC24B   | 4   | 110354928 | 110462052 | 1      |
| CCDC109B | 4   | 110481361 | 110609874 | 1      |
| CASP6    | 4   | 110609785 | 110624739 | -1     |
| PLA2G12A | 4   | 110631145 | 110651233 | -1     |
| CFI      | 4   | 110661852 | 110723335 | -1     |
| GAR1     | 4   | 110736666 | 110745893 | 1      |
| RRH      | 4   | 110749150 | 110765760 | 1      |
| LRIT3    | 4   | 110769358 | 110793471 | 1      |
| EGF      | 4   | 110834040 | 110933422 | 1      |
| ELOVL6   | 4   | 110967002 | 111120355 | -1     |
| RAI14    | 5   | 34656342  | 34832732  | 1      |
| TTC23L   | 5   | 34838938  | 34899561  | 1      |
| RAD1     | 5   | 34905369  | 34919094  | -1     |
| BRIX1    | 5   | 34915481  | 34926101  | 1      |
| DNAJC21  | 5   | 34929698  | 34959069  | 1      |
| AGXT2    | 5   | 34998206  | 35048198  | -1     |
| PRLR     | 5   | 35048861  | 35230794  | -1     |

|          |   |          |          |    |
|----------|---|----------|----------|----|
| SPEF2    | 5 | 35617946 | 35814713 | 1  |
| IL7R     | 5 | 35852797 | 35879705 | 1  |
| CAPSL    | 5 | 35904397 | 35938881 | -1 |
| UGT3A1   | 5 | 35951112 | 36001130 | -1 |
| UGT3A2   | 5 | 36035119 | 36071460 | -1 |
| LMBRD2   | 5 | 36098514 | 36152063 | -1 |
| SKP2     | 5 | 36152091 | 36184421 | 1  |
| RANBP3L  | 5 | 36248536 | 36302216 | -1 |
| OSMR     | 5 | 38845960 | 38945698 | 1  |
| RICTOR   | 5 | 38938021 | 39074510 | -1 |
| FYB      | 5 | 39105338 | 39274630 | -1 |
| C9       | 5 | 39284364 | 39424970 | -1 |
| DAB2     | 5 | 39371780 | 39462402 | -1 |
| ZNF318   | 6 | 43274872 | 43337216 | -1 |
| ABCC10   | 6 | 43395104 | 43418168 | 1  |
| DLK2     | 6 | 43418090 | 43424370 | -1 |
| TJAP1    | 6 | 43445261 | 43474294 | 1  |
| LRRC73   | 6 | 43474707 | 43478424 | -1 |
| POLR1C   | 6 | 43477440 | 43497323 | 1  |
| YIPF3    | 6 | 43479565 | 43484728 | -1 |
| XPO5     | 6 | 43490072 | 43543812 | -1 |
| POLH     | 6 | 43543887 | 43586701 | 1  |
| GTPBP2   | 6 | 43573053 | 43596899 | -1 |
| MAD2L1BP | 6 | 43597277 | 43608689 | 1  |
| RSPH9    | 6 | 43612783 | 43640336 | 1  |
| MRPS18A  | 6 | 43639040 | 43655528 | -1 |
| VEGFA    | 6 | 43737921 | 43754224 | 1  |
| C6orf223 | 6 | 43968317 | 43973695 | 1  |
| MRPL14   | 6 | 44081194 | 44095194 | -1 |
| TMEM63B  | 6 | 44094651 | 44123256 | 1  |
| CAPN11   | 6 | 44126548 | 44152139 | 1  |
| SLC29A1  | 6 | 44187242 | 44201888 | 1  |
| HSP90AB1 | 6 | 44214824 | 44221620 | 1  |
| SLC35B2  | 6 | 44221833 | 44225291 | -1 |
| NFKBIE   | 6 | 44225903 | 44233500 | -1 |
| TMEM151B | 6 | 44238203 | 44275243 | 1  |
| TCTE1    | 6 | 44246480 | 44265458 | -1 |
| AARS2    | 6 | 44267391 | 44281063 | -1 |
| SPATS1   | 6 | 44310397 | 44344904 | 1  |
| CYP3A43  | 7 | 99425636 | 99463718 | 1  |
| OR2AE1   | 7 | 99473610 | 99474680 | -1 |
| TRIM4    | 7 | 99474581 | 99517223 | -1 |
| GJC3     | 7 | 99520892 | 99527243 | -1 |
| AZGP1    | 7 | 99564343 | 99573780 | -1 |
| ZKSCAN1  | 7 | 99613204 | 99639312 | 1  |
| ZSCAN21  | 7 | 99647390 | 99662661 | 1  |
| ZNF3     | 7 | 99661656 | 99680171 | -1 |
| COPS6    | 7 | 99686577 | 99689823 | 1  |
| MCM7     | 7 | 99690351 | 99699563 | -1 |
| AP4M1    | 7 | 99699172 | 99707968 | 1  |

|           |   |           |           |    |
|-----------|---|-----------|-----------|----|
| TAF6      | 7 | 99704693  | 99717464  | -1 |
| CNPY4     | 7 | 99717236  | 99723134  | 1  |
| MBLAC1    | 7 | 99724317  | 99726118  | 1  |
| C7orf43   | 7 | 99752043  | 99756338  | -1 |
| GAL3ST4   | 7 | 99756867  | 99766373  | -1 |
| GPC2      | 7 | 99767229  | 99774995  | -1 |
| STAG3     | 7 | 99775186  | 99819111  | 1  |
| GATS      | 7 | 99798276  | 99869837  | -1 |
| PVRIG     | 7 | 99815864  | 99819113  | 1  |
| SPDYE3    | 7 | 99905325  | 99919819  | 1  |
| PILRB     | 7 | 99933737  | 99965356  | 1  |
| PILRA     | 7 | 99965153  | 99997719  | 1  |
| ZCWPW1    | 7 | 99998449  | 100026615 | -1 |
| MEPCE     | 7 | 100026413 | 100031741 | 1  |
| PPP1R35   | 7 | 100032905 | 100034188 | -1 |
| C7orf61   | 7 | 100054238 | 100061894 | -1 |
| TSC22D4   | 7 | 100060982 | 100076902 | -1 |
| NYAP1     | 7 | 100081550 | 100092422 | 1  |
| AGFG2     | 7 | 100136834 | 100165842 | 1  |
| LRCH4     | 7 | 100169855 | 100183776 | -1 |
| SAP25     | 7 | 100169855 | 100171270 | -1 |
| FBXO24    | 7 | 100181605 | 100198740 | 1  |
| PCOLCE    | 7 | 100199800 | 100205798 | 1  |
| MOSPD3    | 7 | 100209725 | 100213007 | 1  |
| TFR2      | 7 | 100218039 | 100240402 | -1 |
| ACTL6B    | 7 | 100240720 | 100254084 | -1 |
| GNB2      | 7 | 100271154 | 100276797 | 1  |
| GIGYF1    | 7 | 100277130 | 100287071 | -1 |
| POP7      | 7 | 100303676 | 100305118 | 1  |
| EPO       | 7 | 100318423 | 100321323 | 1  |
| ZAN       | 7 | 100331249 | 100395419 | 1  |
| EPHB4     | 7 | 100400187 | 100425121 | -1 |
| SLC12A9   | 7 | 100424442 | 100464631 | 1  |
| TRIP6     | 7 | 100464760 | 100471076 | 1  |
| SRRT      | 7 | 100472733 | 100486285 | 1  |
| UFSP1     | 7 | 100486346 | 100487339 | -1 |
| ACHE      | 7 | 100487615 | 100494594 | -1 |
| LHFPL3    | 7 | 103969104 | 104549001 | 1  |
| SRPK2     | 7 | 104751151 | 105039755 | -1 |
| PUS7      | 7 | 105080108 | 105162714 | -1 |
| RINT1     | 7 | 105172532 | 105208124 | 1  |
| ATXN7L1   | 7 | 105245514 | 105517050 | -1 |
| PEBP4     | 8 | 22570769  | 22857513  | -1 |
| RHOBTB2   | 8 | 22844930  | 22877712  | 1  |
| TNFRSF10B | 8 | 22877646  | 22926692  | -1 |
| TNFRSF10C | 8 | 22941868  | 22974950  | 1  |
| TNFRSF10D | 8 | 22993101  | 23021543  | -1 |
| TNFRSF10A | 8 | 23047965  | 23082639  | -1 |
| CHMP7     | 8 | 23101150  | 23119512  | 1  |
| R3HCC1    | 8 | 23127633  | 23153792  | 1  |

|           |    |           |           |    |
|-----------|----|-----------|-----------|----|
| LOXL2     | 8  | 23154702  | 23282841  | -1 |
| ENTPD4    | 8  | 23243296  | 23315208  | -1 |
| SLC25A37  | 8  | 23386318  | 23432976  | 1  |
| NKX2-6    | 8  | 23559964  | 23564111  | -1 |
| SMC5      | 9  | 72873937  | 72969804  | 1  |
| KLF9      | 9  | 72999503  | 73029540  | -1 |
| TRPM3     | 9  | 73143979  | 74061820  | -1 |
| RORB      | 9  | 77112281  | 77308093  | 1  |
| GABBR2    | 9  | 101050391 | 101471479 | -1 |
| ANKS6     | 9  | 101493611 | 101559247 | -1 |
| GALNT12   | 9  | 101569981 | 101612363 | 1  |
| COL15A1   | 9  | 101705461 | 101833069 | 1  |
| TGFBR1    | 9  | 101866320 | 101916474 | 1  |
| ALG2      | 9  | 101978708 | 101984238 | -1 |
| SEC61B    | 9  | 101984346 | 101992897 | 1  |
| OR13F1    | 9  | 107266455 | 107267547 | 1  |
| OR13C4    | 9  | 107288534 | 107289490 | -1 |
| OR13C3    | 9  | 107298030 | 107299137 | -1 |
| OR13C8    | 9  | 107331449 | 107332411 | 1  |
| OR13C5    | 9  | 107360650 | 107361788 | -1 |
| OR13C2    | 9  | 107366924 | 107367951 | -1 |
| OR13C9    | 9  | 107379529 | 107380485 | -1 |
| OR13D1    | 9  | 107456660 | 107457766 | 1  |
| NIPSNAP3A | 9  | 107509969 | 107522403 | 1  |
| NIPSNAP3B | 9  | 107526438 | 107539738 | 1  |
| ABCA1     | 9  | 107543283 | 107690518 | -1 |
| SLC44A1   | 9  | 108006903 | 108201452 | 1  |
| KIAA1217  | 10 | 23983675  | 24836772  | 1  |
| ARHGAP21  | 10 | 24872538  | 25012597  | -1 |
| PRTFDC1   | 10 | 25137536  | 25241533  | -1 |
| ENKUR     | 10 | 25270908  | 25305089  | -1 |
| THNSL1    | 10 | 25305587  | 25315593  | 1  |
| GPR158    | 10 | 25463991  | 25891155  | 1  |
| NSMCE4A   | 10 | 123716603 | 123734732 | -1 |
| TACC2     | 10 | 123748689 | 124014060 | 1  |
| BTBD16    | 10 | 124030821 | 124097677 | 1  |
| PLEKHA1   | 10 | 124134212 | 124191867 | 1  |
| ARMS2     | 10 | 124214169 | 124216868 | 1  |
| HTRA1     | 10 | 124221041 | 124274424 | 1  |
| DMBT1     | 10 | 124320181 | 124403252 | 1  |
| C10orf120 | 10 | 124457225 | 124459338 | -1 |
| CUZD1     | 10 | 124591665 | 124639146 | -1 |
| FAM24B    | 10 | 124608594 | 124639157 | -1 |
| FAM24A    | 10 | 124670217 | 124672627 | 1  |
| C10orf88  | 10 | 124690419 | 124713919 | -1 |
| OR10A7    | 12 | 55614809  | 55615759  | 1  |
| OR6C74    | 12 | 55640982  | 55642086  | 1  |
| OR6C6     | 12 | 55688072  | 55689016  | -1 |
| OR6C1     | 12 | 55714346  | 55715408  | 1  |
| OR6C3     | 12 | 55725485  | 55726420  | 1  |

|         |    |           |           |    |
|---------|----|-----------|-----------|----|
| OR6C75  | 12 | 55758895  | 55759833  | 1  |
| OR6C65  | 12 | 55794214  | 55795289  | 1  |
| OR6C76  | 12 | 55820038  | 55820976  | 1  |
| OR6C2   | 12 | 55845998  | 55846936  | 1  |
| OR6C70  | 12 | 55862984  | 55863922  | -1 |
| OR6C68  | 12 | 55886147  | 55887100  | 1  |
| OR6C4   | 12 | 55944983  | 55946028  | 1  |
| OR10P1  | 12 | 56030644  | 56031638  | 1  |
| METTL7B | 12 | 56075330  | 56078395  | 1  |
| ITGA7   | 12 | 56078352  | 56109827  | -1 |
| BLOC1S1 | 12 | 56109820  | 56113871  | 1  |
| RDH5    | 12 | 56114151  | 56118489  | 1  |
| CD63    | 12 | 56119107  | 56123491  | -1 |
| GDF11   | 12 | 56137064  | 56150911  | 1  |
| SARNP   | 12 | 56146247  | 56211540  | -1 |
| ORMDL2  | 12 | 56211703  | 56215663  | 1  |
| DNAJC14 | 12 | 56214744  | 56224608  | -1 |
| MMP19   | 12 | 56229217  | 56236750  | -1 |
| WIBG    | 12 | 56295197  | 56326402  | -1 |
| DGKA    | 12 | 56321103  | 56347811  | 1  |
| PMEL    | 12 | 56347889  | 56367101  | -1 |
| CDK2    | 12 | 56360553  | 56366568  | 1  |
| RAB5B   | 12 | 56367697  | 56388490  | 1  |
| SUOX    | 12 | 56390964  | 56400425  | 1  |
| IKZF4   | 12 | 56401443  | 56432219  | 1  |
| RPS26   | 12 | 56435637  | 56438116  | 1  |
| ERBB3   | 12 | 56473641  | 56497289  | 1  |
| PA2G4   | 12 | 56498103  | 56507691  | 1  |
| ZC3H10  | 12 | 56511943  | 56516278  | 1  |
| ESYT1   | 12 | 56512034  | 56538455  | 1  |
| MYL6B   | 12 | 56546040  | 56553431  | 1  |
| MYL6    | 12 | 56551945  | 56557280  | 1  |
| SMARCC2 | 12 | 56556767  | 56583351  | -1 |
| RNF41   | 12 | 56598285  | 56615717  | -1 |
| NABP2   | 12 | 56615799  | 56623638  | 1  |
| SLC39A5 | 12 | 56623833  | 56631630  | 1  |
| ANKRD52 | 12 | 56631591  | 56652175  | -1 |
| COQ10A  | 12 | 56660642  | 56664750  | 1  |
| CS      | 12 | 56665483  | 56694176  | -1 |
| CNPY2   | 12 | 56703626  | 56710120  | -1 |
| PAN2    | 12 | 56710007  | 56727837  | -1 |
| FAM216A | 12 | 110906169 | 110928190 | 1  |
| VPS29   | 12 | 110928902 | 110939922 | -1 |
| RAD9B   | 12 | 110939460 | 110969891 | 1  |
| PPTC7   | 12 | 110969120 | 111021125 | -1 |
| TCTN1   | 12 | 111051832 | 111087235 | 1  |
| HVCN1   | 12 | 111065646 | 111142755 | -1 |
| PPP1CC  | 12 | 111157485 | 111180744 | -1 |
| CCDC63  | 12 | 111284573 | 111345339 | 1  |
| MYL2    | 12 | 111348623 | 111358526 | -1 |

|          |    |           |           |    |
|----------|----|-----------|-----------|----|
| CUX2     | 12 | 111471828 | 111788358 | 1  |
| FAM109A  | 12 | 111798455 | 111806925 | -1 |
| SH2B3    | 12 | 111843752 | 111889427 | 1  |
| ATXN2    | 12 | 111890018 | 112037480 | -1 |
| BRAP     | 12 | 112079950 | 112123790 | -1 |
| ACAD10   | 12 | 112123857 | 112194903 | 1  |
| ALDH2    | 12 | 112204691 | 112247782 | 1  |
| MAPKAPK5 | 12 | 112279782 | 112334343 | 1  |
| TMEM116  | 12 | 112369086 | 112450970 | -1 |
| ERP29    | 12 | 112451120 | 112461255 | 1  |
| NAA25    | 12 | 112464500 | 112546826 | -1 |
| TRAFD1   | 12 | 112563305 | 112591407 | 1  |
| HECTD4   | 12 | 112597992 | 112819896 | -1 |
| RPL6     | 12 | 112842994 | 112856642 | -1 |
| PTPN11   | 12 | 112856155 | 112947717 | 1  |
| RPH3A    | 12 | 113008184 | 113336686 | 1  |
| OAS1     | 12 | 113344582 | 113369990 | 1  |
| OAS3     | 12 | 113376157 | 113411054 | 1  |
| OAS2     | 12 | 113416200 | 113449528 | 1  |
| DTX1     | 12 | 113494514 | 113535833 | 1  |
| ALOX5AP  | 13 | 31309645  | 31338556  | 1  |
| TEX26    | 13 | 31506840  | 31549639  | 1  |
| HSPH1    | 13 | 31710762  | 31736525  | -1 |
| B3GALTL  | 13 | 31774073  | 31906413  | 1  |
| RXFP2    | 13 | 32313674  | 32377009  | 1  |
| ZFYVE26  | 14 | 68194091  | 68283307  | -1 |
| RAD51B   | 14 | 68286496  | 69196935  | 1  |
| ZFP36L1  | 14 | 69254377  | 69263190  | -1 |
| ACTN1    | 14 | 69340860  | 69446157  | -1 |
| DCAF5    | 14 | 69517598  | 69619867  | -1 |
| ALDH1A2  | 15 | 58245622  | 58790065  | -1 |
| AQP9     | 15 | 58430368  | 58478110  | 1  |
| LIPC     | 15 | 58702768  | 58861151  | 1  |
| ADAM10   | 15 | 58887403  | 59042177  | -1 |
| FAM63B   | 15 | 59063391  | 59154099  | 1  |
| SLTM     | 15 | 59171244  | 59225852  | -1 |
| OGFOD1   | 16 | 56485402  | 56513012  | 1  |
| BBS2     | 16 | 56500748  | 56554195  | -1 |
| MT4      | 16 | 56598961  | 56602869  | 1  |
| MT3      | 16 | 56622986  | 56625000  | 1  |
| MT1E     | 16 | 56659387  | 56661024  | 1  |
| MT1M     | 16 | 56666145  | 56667898  | 1  |
| MT1B     | 16 | 56685811  | 56687116  | 1  |
| MT1F     | 16 | 56691606  | 56694610  | 1  |
| MT1G     | 16 | 56700643  | 56701977  | -1 |
| MT1H     | 16 | 56703726  | 56705041  | 1  |
| MT1X     | 16 | 56716336  | 56718108  | 1  |
| NUP93    | 16 | 56764017  | 56878797  | 1  |
| SLC12A3  | 16 | 56899119  | 56949762  | 1  |
| HERPUD1  | 16 | 56965960  | 56977798  | 1  |

|           |    |          |          |    |
|-----------|----|----------|----------|----|
| CETP      | 16 | 56995762 | 57017757 | 1  |
| NLRC5     | 16 | 57023397 | 57117443 | 1  |
| CPNE2     | 16 | 57126449 | 57181878 | 1  |
| FAM192A   | 16 | 57186378 | 57220028 | -1 |
| RSPRY1    | 16 | 57220049 | 57274387 | 1  |
| ARL2BP    | 16 | 57279010 | 57287516 | 1  |
| PLLP      | 16 | 57290004 | 57318599 | -1 |
| CCL22     | 16 | 57392684 | 57400102 | 1  |
| CX3CL1    | 16 | 57406370 | 57418960 | 1  |
| CCL17     | 16 | 57438679 | 57449974 | 1  |
| CIAPIN1   | 16 | 57462081 | 57481440 | -1 |
| COQ9      | 16 | 57481337 | 57495187 | 1  |
| POLR2C    | 16 | 57496299 | 57505922 | 1  |
| DOK4      | 16 | 57505863 | 57521239 | -1 |
| MLKL      | 16 | 74705753 | 74734858 | -1 |
| FA2H      | 16 | 74746853 | 74808729 | -1 |
| WDR59     | 16 | 74907468 | 75034071 | -1 |
| ZNRF1     | 16 | 75032928 | 75144892 | 1  |
| LDHD      | 16 | 75145758 | 75150669 | -1 |
| ZFP1      | 16 | 75182390 | 75206134 | 1  |
| CTRB2     | 16 | 75237994 | 75241083 | -1 |
| CTRB1     | 16 | 75252898 | 75258822 | 1  |
| BCAR1     | 16 | 75262928 | 75301951 | -1 |
| CFDP1     | 16 | 75327596 | 75467383 | -1 |
| TMEM170A  | 16 | 75476952 | 75499395 | -1 |
| CHST6     | 16 | 75510949 | 75529282 | -1 |
| CHST5     | 16 | 75562433 | 75569145 | -1 |
| TMEM231   | 16 | 75572015 | 75590184 | -1 |
| GABARAPL2 | 16 | 75600249 | 75611779 | 1  |
| ADAT1     | 16 | 75630879 | 75657198 | -1 |
| KARS      | 16 | 75661622 | 75682541 | -1 |
| TERF2IP   | 16 | 75681684 | 75795770 | 1  |
| NOS2      | 17 | 26083792 | 26127525 | -1 |
| NLK       | 17 | 26368763 | 26523407 | 1  |
| TMEM97    | 17 | 26646121 | 26655707 | 1  |
| IFT20     | 17 | 26655352 | 26662515 | -1 |
| TNFAIP1   | 17 | 26662628 | 26674035 | 1  |
| TMEM199   | 17 | 26684604 | 26708716 | 1  |
| VTN       | 17 | 26691290 | 26700110 | -1 |
| SEBOX     | 17 | 26691290 | 26692265 | -1 |
| SARM1     | 17 | 26691378 | 26728065 | 1  |
| SLC46A1   | 17 | 26721661 | 26734215 | -1 |
| SLC13A2   | 17 | 26800311 | 26824799 | 1  |
| FOXN1     | 17 | 26833261 | 26865914 | 1  |
| UNC119    | 17 | 26873725 | 26879686 | -1 |
| PIGS      | 17 | 26880401 | 26898890 | -1 |
| ALDOC     | 17 | 26900133 | 26904282 | -1 |
| SPAG5     | 17 | 26904588 | 26926297 | -1 |
| SGK494    | 17 | 26934982 | 26941218 | -1 |
| KIAA0100  | 17 | 26941458 | 26972472 | -1 |

|          |    |          |          |    |
|----------|----|----------|----------|----|
| SDF2     | 17 | 26975374 | 26989207 | -1 |
| SUPT6H   | 17 | 26989109 | 27029697 | 1  |
| PROCA1   | 17 | 27030215 | 27038872 | -1 |
| RAB34    | 17 | 27041299 | 27045447 | -1 |
| RPL23A   | 17 | 27046411 | 27051377 | 1  |
| TLCD1    | 17 | 27051366 | 27054953 | -1 |
| NEK8     | 17 | 27052915 | 27070473 | 1  |
| TRAF4    | 17 | 27071002 | 27077974 | 1  |
| FAM222B  | 17 | 27082996 | 27182250 | -1 |
| ERAL1    | 17 | 27181956 | 27188085 | 1  |
| FLOT2    | 17 | 27206353 | 27224697 | -1 |
| DHRS13   | 17 | 27224799 | 27230089 | -1 |
| PHF12    | 17 | 27232268 | 27278789 | -1 |
| BAIAP2   | 17 | 79008948 | 79091232 | 1  |
| AATK     | 17 | 79091095 | 79139877 | -1 |
| ENTHD2   | 17 | 79202077 | 79212891 | -1 |
| SLC38A10 | 17 | 79218800 | 79269347 | -1 |
| TMEM105  | 17 | 79285074 | 79304474 | -1 |
| BAHCC1   | 17 | 79369275 | 79440126 | 1  |
| ACTG1    | 17 | 79476997 | 79490873 | -1 |
| FSCN2    | 17 | 79495422 | 79504156 | 1  |
| C17orf70 | 17 | 79506911 | 79520987 | -1 |
| NPLOC4   | 17 | 79523913 | 79615495 | -1 |
| TSPAN10  | 17 | 79604197 | 79615779 | 1  |
| PDE6G    | 17 | 79617489 | 79630142 | -1 |
| OXLD1    | 17 | 79632066 | 79633665 | -1 |
| CCDC137  | 17 | 79633394 | 79640934 | 1  |
| ARL16    | 17 | 79648204 | 79650954 | -1 |
| HGS      | 17 | 79650356 | 79670168 | 1  |
| MRPL12   | 17 | 79670387 | 79674556 | 1  |
| SLC25A10 | 17 | 79670401 | 79687569 | 1  |
| GCGR     | 17 | 79762008 | 79771889 | 1  |
| FAM195B  | 17 | 79780287 | 79791178 | -1 |
| PPP1R27  | 17 | 79791368 | 79792926 | -1 |
| P4HB     | 17 | 79801035 | 79818570 | -1 |
| ARHGDI A | 17 | 79825597 | 79829282 | -1 |
| ALYREF   | 17 | 79845713 | 79849462 | -1 |
| ANAPC11  | 17 | 79848666 | 79858867 | 1  |
| NPB      | 17 | 79858621 | 79860781 | 1  |
| PCYT2    | 17 | 79858841 | 79869340 | -1 |
| SIRT7    | 17 | 79869815 | 79879199 | -1 |
| MAFG     | 17 | 79876146 | 79885590 | -1 |
| PYCR1    | 17 | 79890260 | 79900288 | -1 |
| MYADML2  | 17 | 79897521 | 79905109 | -1 |
| NOTUM    | 17 | 79910388 | 79919716 | -1 |
| ASPSCR1  | 17 | 79934683 | 79975282 | 1  |
| STRA13   | 17 | 79976578 | 79981983 | -1 |
| LRRRC45  | 17 | 79981178 | 79989027 | 1  |
| RAC3     | 17 | 79989500 | 79992080 | 1  |
| DCXR     | 17 | 79993012 | 79995608 | -1 |



|          |    |          |          |    |
|----------|----|----------|----------|----|
| RFNG     | 17 | 80005778 | 80009707 | -1 |
| GPS1     | 17 | 80008567 | 80015346 | 1  |
| DUS1L    | 17 | 80015382 | 80023763 | -1 |
| FASN     | 17 | 80036214 | 80056208 | -1 |
| CCDC57   | 17 | 80059336 | 80170706 | -1 |
| SLC16A3  | 17 | 80186273 | 80219005 | 1  |
| CDC34    | 19 | 531714   | 542097   | 1  |
| GZMM     | 19 | 544034   | 549919   | 1  |
| BSG      | 19 | 571297   | 583493   | 1  |
| HCN2     | 19 | 589893   | 617159   | 1  |
| POLRMT   | 19 | 617223   | 633597   | -1 |
| FGF22    | 19 | 639879   | 643703   | 1  |
| RNF126   | 19 | 647526   | 663277   | -1 |
| FSTL3    | 19 | 676392   | 683385   | 1  |
| PRSS57   | 19 | 685521   | 695460   | -1 |
| PALM     | 19 | 708953   | 748329   | 1  |
| PTBP1    | 19 | 797075   | 812327   | 1  |
| AZU1     | 19 | 825097   | 832017   | 1  |
| PRTN3    | 19 | 840963   | 848175   | 1  |
| ELANE    | 19 | 851014   | 856242   | 1  |
| CFD      | 19 | 859453   | 863453   | 1  |
| MED16    | 19 | 867962   | 893218   | -1 |
| R3HDM4   | 19 | 896503   | 913240   | -1 |
| KISS1R   | 19 | 917287   | 921015   | 1  |
| ARID3A   | 19 | 925781   | 975939   | 1  |
| WDR18    | 19 | 983174   | 994569   | 1  |
| GRIN3B   | 19 | 1000418  | 1009731  | 1  |
| CNN2     | 19 | 1026298  | 1039068  | 1  |
| ABCA7    | 19 | 1040102  | 1065571  | 1  |
| HMHA1    | 19 | 1065922  | 1086627  | 1  |
| POLR2E   | 19 | 1086594  | 1095598  | -1 |
| GPX4     | 19 | 1103936  | 1106787  | 1  |
| SBNO2    | 19 | 1107636  | 1174282  | -1 |
| STK11    | 19 | 1189406  | 1228428  | 1  |
| C19orf26 | 19 | 1228286  | 1238026  | -1 |
| ATP5D    | 19 | 1241749  | 1244824  | 1  |
| MIDN     | 19 | 1248552  | 1259142  | 1  |
| CIRBP    | 19 | 1259384  | 1274879  | 1  |
| C19orf24 | 19 | 1275026  | 1279248  | 1  |
| MUM1     | 19 | 1285890  | 1378430  | 1  |
| EFNA2    | 19 | 1286153  | 1301430  | 1  |
| NDUFS7   | 19 | 1383526  | 1395583  | 1  |
| GAMT     | 19 | 1397091  | 1401569  | -1 |
| DAZAP1   | 19 | 1407568  | 1435719  | 1  |
| RPS15    | 19 | 1438358  | 1440583  | 1  |
| APC2     | 19 | 1446300  | 1473243  | 1  |
| C19orf25 | 19 | 1461142  | 1479555  | -1 |
| PCSK4    | 19 | 1481427  | 1490751  | -1 |
| REEP6    | 19 | 1491165  | 1497926  | 1  |
| ADAMTSL5 | 19 | 1505017  | 1513603  | -1 |

|          |    |          |          |    |
|----------|----|----------|----------|----|
| PTPRS    | 19 | 5158506  | 5340814  | -1 |
| ZNRF4    | 19 | 5455426  | 5456867  | 1  |
| SAFB2    | 19 | 5587010  | 5624057  | -1 |
| SAFB     | 19 | 5623046  | 5668489  | 1  |
| C19orf70 | 19 | 5678432  | 5680907  | -1 |
| HSD11B1L | 19 | 5680615  | 5688533  | 1  |
| LONP1    | 19 | 5691845  | 5720583  | -1 |
| CATSPERD | 19 | 5720688  | 5778745  | 1  |
| PRR22    | 19 | 5782971  | 5784776  | -1 |
| DUS3L    | 19 | 5784843  | 5791249  | -1 |
| NRTN     | 19 | 5823813  | 5828335  | 1  |
| FUT6     | 19 | 5830621  | 5839742  | -1 |
| FUT3     | 19 | 5842899  | 5851485  | -1 |
| FUT5     | 19 | 5865837  | 5903798  | -1 |
| NDUFA11  | 19 | 5891287  | 5904017  | -1 |
| VMAC     | 19 | 5904869  | 5910864  | 1  |
| CAPS     | 19 | 5911718  | 5915888  | 1  |
| RANBP3   | 19 | 5916150  | 5978153  | -1 |
| RFX2     | 19 | 5993175  | 6199583  | -1 |
| ACSBG2   | 19 | 6135258  | 6193112  | 1  |
| MLLT1    | 19 | 6212966  | 6279959  | -1 |
| ACER1    | 19 | 6306153  | 6333640  | -1 |
| CLPP     | 19 | 6361463  | 6368919  | 1  |
| ALKBH7   | 19 | 6372444  | 6375042  | 1  |
| GTF2F1   | 19 | 6379580  | 6393992  | -1 |
| KHSRP    | 19 | 6413359  | 6424805  | -1 |
| SLC25A41 | 19 | 6426048  | 6433790  | -1 |
| SLC25A23 | 19 | 6436090  | 6465214  | -1 |
| CRB3     | 19 | 6463788  | 6467232  | 1  |
| DENND1C  | 19 | 6467218  | 6482568  | -1 |
| TUBB4A   | 19 | 6494330  | 6502859  | -1 |
| TNFSF9   | 19 | 6531010  | 6535931  | 1  |
| CD70     | 19 | 6583194  | 6604114  | -1 |
| TNFSF14  | 19 | 6663148  | 6670599  | -1 |
| C3       | 19 | 6677715  | 6730573  | -1 |
| GPR108   | 19 | 6729925  | 6737614  | -1 |
| TRIP10   | 19 | 6737936  | 6751537  | 1  |
| SH2D3A   | 19 | 6752171  | 6767599  | -1 |
| VAV1     | 19 | 6772725  | 6857377  | 1  |
| MBD3L5   | 19 | 7030589  | 7033022  | 1  |
| MBD3L3   | 19 | 7056220  | 7058651  | -1 |
| ZNF557   | 19 | 7069455  | 7087979  | 1  |
| INSR     | 19 | 7112266  | 7294045  | -1 |
| ZNF285   | 19 | 44886459 | 44905774 | -1 |
| ZNF229   | 19 | 44921685 | 44952766 | -1 |
| ZNF180   | 19 | 44979854 | 45004576 | -1 |
| CEACAM20 | 19 | 45005729 | 45033811 | -1 |
| PVR      | 19 | 45147098 | 45166850 | 1  |
| CEACAM19 | 19 | 45165545 | 45187631 | 1  |
| CEACAM16 | 19 | 45202421 | 45213986 | 1  |

|          |    |          |          |    |
|----------|----|----------|----------|----|
| BCL3     | 19 | 45250962 | 45263301 | 1  |
| CBLC     | 19 | 45281126 | 45303891 | 1  |
| BCAM     | 19 | 45312328 | 45324673 | 1  |
| PVRL2    | 19 | 45349432 | 45392485 | 1  |
| TOMM40   | 19 | 45393826 | 45406946 | 1  |
| APOE     | 19 | 45409011 | 45412650 | 1  |
| APOC1    | 19 | 45417504 | 45422606 | 1  |
| APOC4    | 19 | 45445495 | 45452820 | 1  |
| APOC2    | 19 | 45449243 | 45452822 | 1  |
| CLPTM1   | 19 | 45457842 | 45496599 | 1  |
| RELB     | 19 | 45504688 | 45541452 | 1  |
| CLASRP   | 19 | 45542298 | 45574214 | 1  |
| ZNF296   | 19 | 45574758 | 45579846 | -1 |
| GEMIN7   | 19 | 45582453 | 45594782 | 1  |
| MARK4    | 19 | 45582546 | 45808541 | 1  |
| NKPD1    | 19 | 45653008 | 45663408 | -1 |
| TRAPPC6A | 19 | 45666186 | 45681495 | -1 |
| BLOC1S3  | 19 | 45682003 | 45685059 | 1  |
| EXOC3L2  | 19 | 45715879 | 45737469 | -1 |
| CKM      | 19 | 45809672 | 45826235 | -1 |
| KLC3     | 19 | 45836692 | 45854778 | 1  |
| ERCC2    | 19 | 45853095 | 45874176 | -1 |
| PPP1R13L | 19 | 45882892 | 45909607 | -1 |
| CD3EAP   | 19 | 45909467 | 45914024 | 1  |
| ERCC1    | 19 | 45910591 | 45982086 | -1 |
| FOSB     | 19 | 45971253 | 45978437 | 1  |
| RTN2     | 19 | 45988547 | 46000319 | -1 |
| PPM1N    | 19 | 45992035 | 46005768 | 1  |
| VASP     | 19 | 46009837 | 46030241 | 1  |
| OPA3     | 19 | 46030685 | 46105470 | -1 |
| GPR4     | 19 | 46093022 | 46105466 | -1 |
| EML2     | 19 | 46110252 | 46148887 | -1 |
| GIPR     | 19 | 46171502 | 46186982 | 1  |
| QPCTL    | 19 | 46195741 | 46207247 | 1  |
| FBXO46   | 19 | 46213887 | 46234162 | -1 |
| SIX5     | 19 | 46268043 | 46272484 | -1 |
| DMPK     | 19 | 46272975 | 46285810 | -1 |
| DMWD     | 19 | 46286205 | 46296060 | -1 |
| RSPH6A   | 19 | 46298968 | 46318577 | -1 |
| SPINT3   | 20 | 44141101 | 44144264 | -1 |
| WFDC6    | 20 | 44162835 | 44168134 | -1 |
| EPPIN    | 20 | 44165625 | 44176391 | -1 |
| WFDC8    | 20 | 44179792 | 44207965 | -1 |
| WFDC9    | 20 | 44236578 | 44259907 | -1 |
| WFDC10A  | 20 | 44258165 | 44259835 | 1  |
| WFDC11   | 20 | 44277202 | 44298909 | -1 |
| WFDC10B  | 20 | 44313292 | 44333658 | -1 |
| WFDC13   | 20 | 44330655 | 44337456 | 1  |
| SPINT4   | 20 | 44350990 | 44354469 | 1  |
| WFDC3    | 20 | 44376583 | 44420571 | -1 |

|          |    |          |          |    |
|----------|----|----------|----------|----|
| DNTTIP1  | 20 | 44420576 | 44440066 | 1  |
| UBE2C    | 20 | 44441215 | 44445596 | 1  |
| TNNC2    | 20 | 44451853 | 44462384 | -1 |
| SNX21    | 20 | 44462449 | 44471914 | 1  |
| ACOT8    | 20 | 44470360 | 44486045 | -1 |
| ZSWIM3   | 20 | 44486256 | 44507761 | 1  |
| ZSWIM1   | 20 | 44509866 | 44513905 | 1  |
| SPATA25  | 20 | 44515128 | 44516274 | -1 |
| NEURL2   | 20 | 44517264 | 44519926 | -1 |
| CTSA     | 20 | 44518783 | 44527459 | 1  |
| PLTP     | 20 | 44527399 | 44540794 | -1 |
| PCIF1    | 20 | 44563267 | 44576662 | 1  |
| ZNF335   | 20 | 44577292 | 44600833 | -1 |
| MMP9     | 20 | 44637547 | 44645200 | 1  |
| SLC12A5  | 20 | 44650356 | 44688784 | 1  |
| NCOA5    | 20 | 44689624 | 44718591 | -1 |
| CD40     | 20 | 44746911 | 44758502 | 1  |
| CDH22    | 20 | 44802372 | 44937137 | -1 |
| SLC35C2  | 20 | 44978167 | 44993043 | -1 |
| ELMO2    | 20 | 44994688 | 45061704 | -1 |
| ZNF334   | 20 | 45129701 | 45142198 | -1 |
| CTCFL    | 20 | 56071035 | 56100708 | -1 |
| PCK1     | 20 | 56136136 | 56141513 | 1  |
| ZBP1     | 20 | 56178902 | 56195632 | -1 |
| PMEPA1   | 20 | 56223448 | 56286592 | -1 |
| C20orf85 | 20 | 56725960 | 56736206 | 1  |
| ANKRD60  | 20 | 56793551 | 56803709 | -1 |
| RAB22A   | 20 | 56884752 | 56942563 | 1  |
| VAPB     | 20 | 56964178 | 57026157 | 1  |
| APCDD1L  | 20 | 57034157 | 57090187 | -1 |
| C22orf42 | 22 | 32544993 | 32555309 | -1 |
| RFPL2    | 22 | 32586422 | 32600718 | -1 |
| SLC5A4   | 22 | 32614465 | 32651328 | -1 |
| RFPL3    | 22 | 32750872 | 32757148 | 1  |
| BPIFC    | 22 | 32809834 | 32860471 | -1 |
| FBXO7    | 22 | 32870663 | 32894818 | 1  |
| SYN3     | 22 | 32908539 | 33454358 | -1 |
| TIMP3    | 22 | 33197687 | 33259030 | 1  |
| ELFN2    | 22 | 37764000 | 37823505 | -1 |
| MFNG     | 22 | 37865101 | 37882439 | -1 |
| CARD10   | 22 | 37886400 | 37915549 | -1 |
| CDC42EP1 | 22 | 37956454 | 37965412 | 1  |
| LGALS2   | 22 | 37966255 | 37978623 | -1 |
| GGA1     | 22 | 38004481 | 38029571 | 1  |
| SH3BP1   | 22 | 38030661 | 38062939 | 1  |
| PDXP     | 22 | 38054734 | 38062941 | 1  |
| LGALS1   | 22 | 38071615 | 38075813 | 1  |
| NOL12    | 22 | 38077680 | 38170137 | 1  |
| TRIOBP   | 22 | 38093011 | 38172563 | 1  |
| H1FO     | 22 | 38201114 | 38203442 | 1  |

|          |    |          |          |    |
|----------|----|----------|----------|----|
| GCAT     | 22 | 38203912 | 38213183 | 1  |
| GALR3    | 22 | 38219389 | 38221502 | 1  |
| ANKRD54  | 22 | 38226862 | 38245334 | -1 |
| EIF3L    | 22 | 38244875 | 38285414 | 1  |
| MICALL1  | 22 | 38301664 | 38338829 | 1  |
| C22orf23 | 22 | 38339528 | 38349676 | -1 |
| POLR2F   | 22 | 38348614 | 38437922 | 1  |
| SOX10    | 22 | 38366693 | 38383429 | -1 |
| PICK1    | 22 | 38452318 | 38471708 | 1  |
| SLC16A8  | 22 | 38474141 | 38480100 | -1 |
| BAIAP2L2 | 22 | 38480896 | 38506677 | -1 |
| PLA2G6   | 22 | 38507502 | 38601697 | -1 |
| MAFF     | 22 | 38597889 | 38612518 | 1  |
| TMEM184B | 22 | 38615298 | 38669040 | -1 |
| CSNK1E   | 22 | 38686697 | 38794527 | -1 |
| KCNJ4    | 22 | 38822332 | 38851205 | -1 |
| KDEL3    | 22 | 38864067 | 38879452 | 1  |
| DDX17    | 22 | 38879445 | 38903665 | -1 |
| DMC1     | 22 | 38914954 | 38966291 | -1 |
| FAM227A  | 22 | 38974125 | 39052634 | -1 |
