# Supplementary material for: Whole-Exome Sequencing in Age-Related Macular Degeneration Identifies Rare Variants in COL8A1, a Component of Bruch’s Membrane
Source: PubMed Central journal article supplement — Ophthalmology. 2018 Sep;125(9):1433–43. doi: 10.1016/j.ophtha.2018.03.040 (PMC6104593; doi:10.1016/j.ophtha.2018.03.040), 2018-09
Supplement: mmc2.pdf [file mmc2.pdf]

**Table S2.** Allele frequencies (%) of rare protein-altering variants identified in the *COL8A1* gene in 1,125 AMD cases and 1,361 controls.

| Chr | Position | Ref. allele | Alt. allele | SNP ID      | dbSNP AF | GoNL AF  | gnomAD AF* | gnomAD NFE AF <sup>#</sup> |
|-----|----------|-------------|-------------|-------------|----------|----------|------------|----------------------------|
| 3   | 99509699 | T           | C           | rs765891663 | NP       | NP       | 4.06E-02   | 4.48E-03                   |
| 3   | 99509735 | T           | C           | ----        | NP       | NP       | NP         | NP                         |
| 3   | 99509813 | C           | T           | rs144518762 | 0.0998   | NP       | 3.83E-02   | 1.80E-03                   |
| 3   | 99513323 | C           | G           | rs768122419 | NP       | NP       | 3.26E-03   | 5.39E-03                   |
| 3   | 99513419 | G           | A           | rs147742993 | NP       | NP       | 2.16E-02   | 3.86E-02                   |
| 3   | 99513494 | C           | T           | rs200078198 | NP       | 0.100402 | 9.36E-03   | 1.61E-02                   |
| 3   | 99513830 | G           | A           | rs139380413 | 0.0199   | 0.301205 | 6.34E-02   | 1.10E-01                   |
| 3   | 99513985 | G           | T           | ----        | NP       | NP       | NP         | NP                         |
| 3   | 99514303 | G           | A           | ----        | NP       | NP       | 7.47E-04   | 0.00E+00                   |
| 3   | 99514749 | C           | G           | rs145251667 | NP       | NP       | 5.69E-03   | 2.69E-03                   |
| 3   | 99514829 | G           | A           | rs150077356 | 0.0199   | 0.100402 | 5.73E-02   | 9.33E-02                   |
| 3   | 99514877 | G           | A           | ----        | NP       | NP       | 4.08E-04   | 9.02E-04                   |
| 3   | 99514968 | G           | T           | ----        | NP       | NP       | NP         | NP                         |
| 3   | 99514977 | G           | C           | ----        | NP       | NP       | NP         | NP                         |

\* Global gnomAD allele frequency (AF) based on whole exome sequencing data.

# GnomAD allele frequency (AF) based on whole exome sequencing data from Non-Finnish European.

NP = "Not present"
